# Supplementary material for: Carvone derived cannabidiol enantiomers as novel anticonvulsants
Source: Neuropsychopharmacology. 2025 Sep 24;50(13):1970–81. doi: 10.1038/s41386-025-02220-1 (PMC12603161; doi:10.1038/s41386-025-02220-1)
Supplement: Supplementary file 2 — Supplementary Table 2 [file 41386_2025_2220_MOESM2_ESM.xlsx]

## Sheet: Sheet1
Figure	Panel	n	Test	Mean ± St Dev	df	Main Effects
		(per group)		OR LS Mean ± St Err LS Mean		p
2	c	6 channels	Two Way RM ANOVA	Baseline: 0.998 ± 0.0419	5	treatment = 0.021
			Bonferroni	(+)-CBDV: 1.196 ± 0.0419		frequency = <0.001
						treatment x frequency = <0.001
	d	6 channels	Two Way RM ANOVA	Baseline: 0.996 ± 0.0463	5	treatment = 0.025
			Bonferroni	(+)-CBDP: 1.204 ± 0.0463		frequency = <0.001
						treatment x frequency = <0.001
	e	6 channels	Two Way RM ANOVA	Baseline: 0.984 ± 0.0210	6	treatment = <0.001
			Bonferroni	(+)-CBD-oct: 1.188 ± 0.0210		frequency = <0.001
						treatment x frequency = <0.001
	f	6 channels	Two-tailed t-test	Baseline: 4.388 ± 0.945	10	treatment = 0.0889
				(+)-CBDV: 6.052 ± 1.946
	g	6 channels	Two-tailed t-test	Baseline: 6.165 ± 1.429	10	treatment = 0.0776
				(+)-CBDV: 8.401 ± 2.390
	h	6 channels	Two-tailed t-test	Baseline: 3.049 ± 0.790	10	treatment = 0.218
				(+)-CBDV: 3.735 ± 1.006
	i	6 channels	Two-tailed t-test	Baseline: 0.947 ± 0.150	10	treatment = 0.148
				(+)-CBDV: 1.105 ± 0.196
	j	6 channels	Two-tailed t-test	Baseline: 0.398 ± 0.122	10	treatment = 0.811
				(+)-CBDV: 0.381 ± 0.120
	k	6 channels	Two-tailed t-test	Baseline: 3.990 ± 1.351	10	treatment = 0.147
				(+)-CBDP: 5.560 ± 2.042
	l	6 channels	Two-tailed t-test	Baseline: 6.149 ± 1.468	10	treatment = 0.0346
				(+)-CBDP: 8.539 ± 1.892
	m	6 channels	Two-tailed t-test	Baseline: 3.847 ± 0.494	10	treatment = 0.178
				(+)-CBDP: 4.358 ± 0.708
	n	6 channels	Two-tailed t-test	Baseline: 0.923 ± 0.0303	10	treatment = 0.0382
				(+)-CBDP: 1.123 ± 0.203
	o	6 channels	Two-tailed t-test	Baseline: 0.366 ± 0.0433	10	treatment = 0.842
				(+)-CBDP: 0.360 ± 0.0539
	p	6 channels	Two-tailed t-test	Baseline: 4.764 ± 0.822	10	treatment = 0.0275
				(+)-CBD-oct: 6.242 ± 1.137
	q	6 channels	Two-tailed t-test	Baseline: 5.918 ± 1.520	10	treatment = 0.0263
				(+)-CBD-oct: 8.407 ± 1.780
	r	6 channels	Two-tailed t-test	Baseline: 3.120 ± 0.553	10	treatment = 0.0589
				(+)-CBD-oct: 3.882 ± 0.679
	s	6 channels	Two-tailed t-test	Baseline: 0.899 ± 0.126	10	treatment = 0.0618
				(+)-CBD-oct: 1.092 ± 0.186
	t	6 channels	Two-tailed t-test	Baseline: 0.372 ± 0.104	10	treatment = 0.699
				(+)-CBD-oct: 0.350 ± 0.0905
3	d	12 mice	Two Way ANOVA	Vehicle: 779.112 ± 29.229	11	treatment = 0.755
		7 mice	Bonferroni	(+)-CBD-oct: 764.036 ± 38.270		time = <0.001
						treatment x time = 0.797
	e	12 mice	Two Way ANOVA	Vehicle: 2.599 ± 0.0973	11	treatment = 0.731
		7 mice	Bonferroni	(+)-CBD-oct: 2.544 ± 0.127		time = <0.001
						treatment x time = 0.804
	f	12 mice	Two-tailed t-test	Vehicle: 9349.342 ± 1509.491	17	treatment = 0.882
		7 mice		(+)-CBD-oct: 9168.429 ± 3739.818
	g	12 mice	Two-tailed t-test	Vehicle: 2.599 ± 0.421	14	treatment = 0.871
		7 mice		(+)-CBD-oct: 2.544 ± 1.039
4	b	10 mice	Two Way RM ANOVA	Vehicle: 5.086 ± 0.409	18	treatment = 0.006
		10 mice	Bonferroni	(+)-CBD-oct: 3.276 ± 0.409
	c	10 mice	Log Rank	Vehicle: 44.000 ± 7.180,	18	treatment = 0.011
		10 mice		(+)-CBD-oct: 122.000 ± 26.220
	e	4 channels	Two-tailed t-test	Vehicle: 4.500 ± 0.577	6	treatment = <0.001
				(+)-CBD-oct: 1.000 ± 0.000
	f	4 channels	Two-tailed t-test	Vehicle: 9.764 ± 0.476	6	treatment = 0.023
				(+)-CBD-oct: 14.170 ± 2.853
	g	4 channels	Two-tailed t-test	Vehicle: 10.418 ± 0.539	6	treatment = 0.015
				(+)-CBD-oct: 15.775 ± 3.136
	h	4478 events	Two-tailed t-test	Vehicle: 315.222 ± 98.307	8352	treatment = <0.001
		3876 events		(+)-CBD-oct: 124.308 ± 71.588
	i	9 mice	Two Way RM ANOVA	Vehicle n=9: 5.189 ± 0.399	18	treatment = 0.009
		10 mice	Bonferroni	(+)-CBD-oct n=10: 3.576 ± 0.379
	j	9 mice	Log Rank	Vehicle n=9: 42.222 ± 9.686	18	treatment = 0.048
		10 mice		(+)-CBD-oct n=10: 102.000 ± 22.652
	l	4 channels	Two-tailed t-test	Vehicle: 8.000 ± 2.309	6	treatment = 0.008
				(+)-CBD-oct: 3.000 ± 1.155
	m	4 channels	Two-tailed t-test	Vehicle: 6.920 ± 0.475	6	treatment = 0.0430
				(+)-CBD-oct: 11.864 ± 3.837
	n	4 channels	Two-tailed t-test	Vehicle: 8.653 ± 1.130	6	treatment = 0.250
				(+)-CBD-oct: 21.508 ± 8.584
	o	4530 events	Two-tailed t-test	Vehicle: 239.470 ± 111.917	6279	treatment = <0.001
		1751 events		(+)-CBD-oct: 154.594 ± 77.503
5	f	5 cells / mouse	Two Way ANOVA	Wildtype vehicle: 10.631 ± 0.485	259	treatment = <0.001
		6 mice per group	Bonferroni	Gabra2-1 vehicle: 7.369 ± 0.485		time = <0.001
				Wildtype (+)-CBD-oct: 10.446 ± 0.485		treatment x distance = 0.343
				Gabra2-1 (+)-CBD-oct: 10.677 ± 0.485
	g	43 segments	One Way ANOVA	Wildtype vehicle: 5.651 ± 0.159	156	treatment = <0.001
		34 segments		Gabra2-1 vehicle: 10.941 ± 0.242
		46 segments		Wildtype (+)-CBD-oct: 7.652 ± 0.125
		34 segments		Gabra2-1 (+)-CBD-oct: 8.559 ± 0.203
		(per mouse, 6 mice per group)
	h	25 segments	One Way ANOVA	Wildtype vehicle: 1.440 ± 0.217	99	treatment = <0.001
		25 segments		Gabra2-1 vehicle: 5.320 ± 0.263
		25 segments (per mouse, 6 mice per group)		Wildtype (+)-CBD-oct: 2.240 ± 0.226
				Gabra2-1 (+)-CBD-oct: 2.720 ± 0.255
	i	25 segments	One Way ANOVA	Wildtype vehicle: 1.520 ± 0.165	99	treatment = <0.001
		25 segments		Gabra2-1 vehicle: 2.320 ± 0.256
		25 segments (per mouse, 6 mice per group)		Wildtype (+)-CBD-oct: 3.320 ± 0.281
				Gabra2-1 (+)-CBD-oct: 3.760 ± 0.393
S1	b	6 channels	Two Way RM ANOVA	Baseline: 0.998 ± 0.0419	5	treatment = 0.316
			Bonferroni	(+)-CBD: 1.196 ± 0.0419		frequency = <0.001
						treatment x frequency = <0.001
	c	6 channels	Two Way RM ANOVA	Baseline: 0.998 ± 0.0419	5	treatment = 0.050
			Bonferroni	(+)-CBD-hex: 1.196 ± 0.0419		frequency = <0.001
						treatment x frequency = <0.001
	d	6 channels	Two-tailed t-test	Baseline: 6.439 ± 2.193	10	treatment = 0.976
				(+)-CBD: 6.407 ± 1.321
	e	6 channels	Two-tailed t-test	Baseline: 4.733 ± 1.299	10	treatment = 0.288
				(+)-CBD-hex: 5.864 ± 2.102
	f	6 channels	Two-tailed t-test	Baseline: 2.904 ± 0.783	10	treatment = 0.595
				(+)-CBD: 3.165 ± 0.863
	g	6 channels	Two-tailed t-test	Baseline: 0.834 ± 0.196	10	treatment = 0.468
				(+)-CBD: 0.942 ± 0.288
	h	6 channels	Two-tailed t-test	Baseline: 0.402 ± 0.120	10	treatment = 0.743
				(+)-CBD: 0.379 ± 0.112
	i	6 channels	Two-tailed t-test	Baseline: 5.012 ± 1.077	10	treatment = 0.0582
				(+)-CBD-hex: 6.721 ± 1.636
	j	6 channels	Two-tailed t-test	Baseline: 5.897 ± 1.296	10	treatment = 0.0782
				(+)-CBD-hex: 7.993 ± 2.272
	k	6 channels	Two-tailed t-test	Baseline: 2.996 ± 0.591	10	treatment = 0.220
				(+)-CBD-hex: 3.440 ± 0.585
	l	6 channels	Two-tailed t-test	Baseline: 0.932 ± 0.0970	10	treatment = 0.113
				(+)-CBD-hex: 1.038 ± 0.115
	m	6 channels	Two-tailed t-test	Baseline: 0.377 ± 0.116	10	treatment = 0.765
				(+)-CBD-hex: 0.355 ± 0.123
S4	f	5 cells / mouse	Two Way ANOVA	Wildtype vehicle: 6.877 ± 0.324	259	treatment = <0.001
		6 mice per group	Bonferroni	Gabra2-1 vehicle: 4.154 ± 0.324		time = <0.001
				Wildtype (+)-CBD-oct: 5.062 ± 0.324		treatment x distance = 0.545
				Gabra2-1 (+)-CBD-oct: 4.769 ± 0.324
	g	10 segments	One Way ANOVA	Wildtype vehicle: 5.300 ± 0.335	40	treatment = <0.001
		11 segments		Gabra2-1 vehicle: 11.273 ± 0.333
		10 segments		Wildtype (+)-CBD-oct: 7.700 ± 0.153
		10 segments (per mouse, 6 mice per group)		Gabra2-1 (+)-CBD-oct: 7.300 ± 0.473
	h	10 segments	One Way ANOVA	Wildtype vehicle: 0.600 ± 0.267	40	treatment = <0.001
		11 segments		Gabra2-1 vehicle: 3.091 ± 0.415
		10 segments		Wildtype (+)-CBD-oct: 1.900 ± 0.277
		10 segments (per mouse, 6 mice per group)		Gabra2-1 (+)-CBD-oct: 1.000 ± 0.298
	i	10 segments	One Way ANOVA	Wildtype vehicle: 2.100 ± 0.458	40	treatment = 0.137
		11 segments		Gabra2-1 vehicle: 3.000 ± 0.467
		10 segments		Wildtype (+)-CBD-oct: 2.900 ± 0.504
		10 segments (per mouse, 6 mice per group)		Gabra2-1 (+)-CBD-oct: 3.800 ± 0.533
